# Supplementary material for: Differential Expression of Stress Adaptation Genes in a Diatom Ulnaria acus under Different Culture Conditions
Source: MDPI journal article supplement (doi:10.3390/ijms25042314), 2024-02-15
Supplement: s1 [file s1]

Supplementary Table S3. Features of predicted DSP amino acid sequences.

| Species                          | NCBI accession number | Abbreviation | Length, a.a. | EF-hand domains    | Signal peptide | Prediction of transmembrane helices in protein |
|----------------------------------|-----------------------|--------------|--------------|--------------------|----------------|------------------------------------------------|
| <i>Thalassiosira pseudonana</i>  | ABU86411.1            | TpDSP1       | 223          | 138-166<br>175-203 | 1-22           | 7-29                                           |
|                                  | ABU86412.1            | TpDSP2       | 230          | 145-173<br>182-210 | 1-24           | -                                              |
| <i>Skeletonema costatum</i>      | AAY27742.1            | ScDSP1       | 232          | 147-175<br>184-212 | 1-23           | 7-29                                           |
|                                  | ABU86410.1            | ScDSP2       | 248          | 159-186<br>194-222 | 1-23           | 7-25                                           |
| <i>Chrysochromulina tobinii</i>  | KOO53112.1            | CtDSP1       | 243          | 158-186<br>195-223 | -              | -                                              |
|                                  | KOO24320.1            | CtDSP2       | 243          | 158-186<br>195-223 | 1-20           | -                                              |
| <i>Emiliana huxley</i>           | XP_005778932.1        | EhDSP1       | 163          | 78-106<br>115-143  | -              | -                                              |
|                                  | XP_005773091.1        | EhDSP2       | 154          | 74-102<br>111-139  | -              | -                                              |
| <i>Phaeodactylum tricornutum</i> | ABU86413.1            | PtDSP        | 244          | 159-187<br>196-224 | 1-18           | -                                              |
| <i>Fragilariopsis cylindrus</i>  | OEU22427.1            | FcDSP        | 187          | 102-130<br>139-167 | -              | -                                              |
| <i>Fistulifera solaris</i>       | GAX13799.1            | FsDSP        | 210          | 124-152<br>162-190 | 1-25           | 7-28                                           |
| <i>Thalassiosira oceanica</i>    | EJK59087.1            | ToDSP        | 362          | 277-305<br>314-342 | -              | -                                              |
| <i>Ulnaria acus</i>              | OR677822              | UaDSP        | 214          | 129-157<br>166-194 | 1-18           | -                                              |
