# Supplementary material for: Differential Expression of Stress Adaptation Genes in a Diatom Ulnaria acus under Different Culture Conditions
Source: MDPI journal article supplement (doi:10.3390/ijms25042314), 2024-02-15
Supplement: s1 [file s1]

Supplementary Table S2. Characteristics of *U. acus* metacaspase genes.

| Contig number<br>* of <i>U. acus</i><br>genome<br>sequence | Position of<br>the MC<br>gene in the<br>contig | Abbreviation<br>in this<br>paper | Abbreviation<br>according<br>to Morozov,<br>2019 | Accession<br>number of<br>the ORF<br>in NCBI | Gene<br>size,<br>b.p. | ORF<br>length,<br>b.p. | Position of<br>introns in the<br>gene |
|------------------------------------------------------------|------------------------------------------------|----------------------------------|--------------------------------------------------|----------------------------------------------|-----------------------|------------------------|---------------------------------------|
| 14822                                                      | 1001-1957                                      | <i>UaMC1</i>                     | Sacus5                                           | OR231937                                     | 957                   | 957                    | absence                               |
| 18835                                                      | 671-1919                                       | <i>UaMC2</i>                     | Sacus6                                           | OR231939                                     | 1249                  | 921                    | 82-335;<br>845-920                    |
| 10107                                                      | 90-1370                                        | <i>UaMC3</i>                     | Sacus3                                           | OR231938                                     | 1281                  | 1281                   | absence                               |
| 22059                                                      | 201-2306                                       | <i>UaMC4</i>                     | Sacus7                                           | OR231943                                     | 2106                  | 2106                   | absence                               |
| 23175                                                      | 201-2306                                       | <i>UaMC5</i>                     | Sacus8                                           | OR231944                                     | 2106                  | 2106                   | absence                               |
| 7784                                                       | 201-1243                                       | <i>UaMC6</i>                     | Sacus2                                           | OR231945                                     | 1043                  | 963                    | 746-826                               |
| 5582                                                       | 176-1218                                       | <i>UaMC7</i>                     | Sacus1                                           | OR231946                                     | 1043                  | 963                    | 746-826                               |
| 12375                                                      | 201-1243                                       | <i>UaMC8</i>                     | Sacus4                                           | OR231947                                     | 1043                  | 963                    | 746-826                               |

\* - by date Galachyants et al., 2015, Assembly and annotation data for the *U. acus* complete genome are freely available at [http:// lin.irk.ru/sacus](http://lin.irk.ru/sacus)
