# Supplementary material for: Differential Expression of Stress Adaptation Genes in a Diatom Ulnaria acus under Different Culture Conditions
Source: MDPI journal article supplement (doi:10.3390/ijms25042314), 2024-02-15

Supplementary Figure S2. Changes in transcription levels of the studied genes (according to Galachyants et al., 2019). A is the transfer of cells from the exponential growth phase (exp) to darkness (dark). B – the return of cells from darkness to light. \* - statistically significant decrease in the level of transcription ( $p < 0.05$ ).

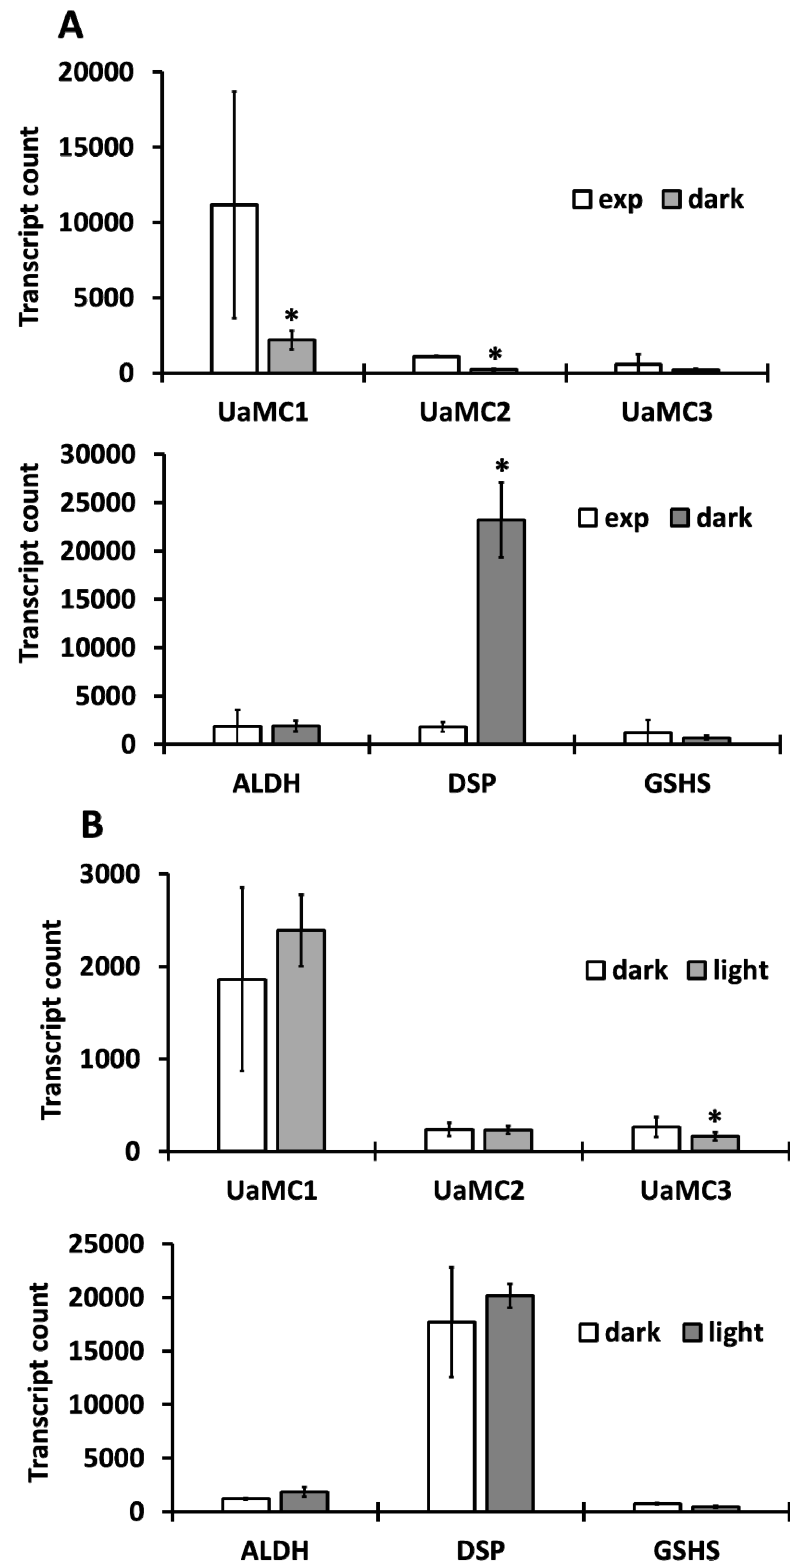

Supplement: s1 [file s1]
