# Supplementary material for: Differential Expression of Stress Adaptation Genes in a Diatom Ulnaria acus under Different Culture Conditions
Source: MDPI journal article supplement (doi:10.3390/ijms25042314), 2024-02-15
Supplement: s1 [file s1]

Supplementary Table S4. ALDH12 amino acid sequences.

| Species                          | NCBI accession number | Abbreviation | Length,<br>a.a. |
|----------------------------------|-----------------------|--------------|-----------------|
| <i>Arabidopsis thaliana</i>      | NP_568955.1           | AtALDH12     | 556             |
| <i>Skeletonema marinoi</i>       | ANG60897.1            | SmALDH12     | 544             |
| <i>Thalassiosira pseudonana</i>  | XP 002295441.1        | TpALDH12     | 537             |
| <i>Fragilaria crotonensis</i>    | KAI2494282.1          | FcALDH12A    | 553             |
|                                  | KAI2491558.1          | FcALDH12B    | 586             |
| <i>Nitzschia inconspicua</i>     | KAG7363017.1          | NiALDH12A    | 564             |
|                                  | KAG7341873.1          | NiALDH12B    | 563             |
| <i>Phaeodactylum tricornutum</i> | XP 002177243.1        | PtALDH12     | 551             |
| <i>Chaetoceros tenuissimus</i>   | GFH52268.1            | CtALDH12     | 552             |
| <i>Ulnaria acus</i>              | OR677820              | UaALDH12     | 560             |
