# Supplementary material for: Differential Expression of Stress Adaptation Genes in a Diatom Ulnaria acus under Different Culture Conditions
Source: MDPI journal article supplement (doi:10.3390/ijms25042314), 2024-02-15
Supplement: s1 [file s1]

**Supplementary Figure S1.** Putative DSP phosphorylation sites in *Thalassiosira pseudonana* (TpDSP1), *Phaeodactylum tricornutum* (PtDSP) and *Ulnaria acus* (UaDSP). *In silico* prediction was performed using NetPhos 2.0. Phosphorylation sites are highlighted in gray.

|        |                                                                                                             |
|--------|-------------------------------------------------------------------------------------------------------------|
|        | ..... ..... ..... ..... ..... ..... ..... ..... ..... ..... ..... ..... ..... ..... ..... ..... ..... ..... |
|        | 5 15 25 35 45 55 65 75 85                                                                                   |
| TpDSP1 | MIAQKKALLATLTIVALNNANAFVVPSTTTARPFISRPLYESSMVDQQUESTTSYQQQHDDDDN---DTNKLIMDIPPTPKAT-----                    |
| PtDSP  | MAKLTSIALCAMLTSSSAFTPTFSSPKQYTCLRMSDLPRQAIPDSIYMQIAMEIPSKNGHTATGFPNLQEQVIPQQVHPVESDRVSLSAQ                  |
| UaDSP  | -MNTYYLLLLATLLGTEVK---AFIVQPIISGCRLQMS--VASSSNHHFMEEAVSIIDESKAQVT---EKNE--MPQAAKPKVS-----                   |
|        | ..... ..... ..... ..... ..... ..... ..... ..... ..... ..... ..... ..... ..... ..... ..... ..... ..... ..... |
|        | 95 105 115 125 135 145 155 165 175                                                                          |
| TpDSP1 | -----PTPKNPAHKEGIFSPLVYAASTVIGPEQLNKVRAQIIISLHSDIISFVSTSDSTLGKAILRQLFEMTDADNSGYLDKREV                       |
| PtDSP  | ALRQKSKPTLPKKMTAKHGDGLFSPLVKLFKAALGDDRLNKIRAKAIATHSEVIASFVETAESASGEAVLDTLFDLSDKNGDGHIDEDEL                  |
| UaDSP  | -----KQAKS-HGKDGLLSPIVTSLKAVIGDDELNKLKRGKVIAMHSDIISFVDTADTRLGQAVLKMMFDVADVDSGTVERDEL                        |
|        | ..... ..... ..... ..... ..... ..... ..... ..... ..... ..... ..... ..... .....                               |
|        | 185 195 205 215 225 235                                                                                     |
| TpDSP1 | EAALNLLGFKWLKEKHVEKIFERADLNSDGEISLEEFMAEAPKTLKVNLVKLAKNNGGDMGLLV                                            |
| PtDSP  | KEALRTLGF AWIEEKQAKGILSRADKDKKGYITKDEWKAEAPKTLRTNLTKLAKKNGGDLGFLV                                           |
| UaDSP  | ERSLKALGFRFLNEKQIKGIFDRADLDKDGHI DLEEWLTEAPKTLRTNLVKLAKQNGGDMGLLA                                           |
