# Supplementary material for: Differential Expression of Stress Adaptation Genes in a Diatom Ulnaria acus under Different Culture Conditions
Source: MDPI journal article supplement (doi:10.3390/ijms25042314), 2024-02-15
Supplement: s1 [file s1]

Supplementary Table S1. Primers for amplification of metacaspase genes. The name indicates the name of the contig, as well as the position of the first nucleotide of the primer in it.

| Primer              | Sequence (5'→3')           |
|---------------------|----------------------------|
| 14822_metcasp_663F  | GAACAATGGCACACATTTCTCCTGGT |
| 14822_metcasp_1309F | ACTCTCTTCCAGCACTCCTATTGATG |
| 14822_metcasp_1915R | CCTCCGACTTTTCCAAA          |
| 18835_metcasp_1848F | CTGTCAATCGCCTCTTCACTCAT    |
| 18835_metcasp_2375F | TTCTTCCTTGTCTCTCACTCTCACAC |
| 18835_metcasp_3619R | AGGTTTTGTTTTGATCCATCC      |
| 10107_6F            | ATCGTGATCGGCGATGTAAC       |
| 10107_604F          | CTCAATATCACCAATTTCCCG      |
| 10107_1712R         | TCAAGCTGTATTCCGCGCTA       |
| 7884_metcasp_2F     | CTTGATTGACGTATCCAGCTACTA   |
| 7884_metcasp_1443R  | TGTAGGGCATTGCTGACTCT       |
| 12375_metcasp_1F    | CTCTCCCACTACTTTTTTCTAGT    |
| 12375_metcasp_1443R | ATTGTAGGGCATTGCTGACT       |
| 23175_metcasp_66F   | ACGTCAGCTCGCCATGATTAAAATA  |
| 23175_metcasp_621F  | TCCTCCTATGTGTTGGATGATGA    |
| 23175_metcasp_1223F | TCAAGCCCCGACACTCAC         |
| 23175_metcasp_2476R | AAACAACGTGGAATCTTTAACTAGAA |
| 22059_metcasp_629F  | TTTTGGATGA TGAAGTGAAA GTTA |
| 22059_metcasp_1219F | TTC GCTCAAGCGC CGACACTC    |
| 22059_metcasp_2476R | AAACAACGTGGAATCTTTTACTAGAA |
| 5582_metcasp_3F     | GGTCAAGTTGTTACAATTTGAAAT   |
| 5582_metcasp_1607R  | CCTCTAAATACGTTAACCATTGT    |
